# Supplementary material for: Photoswitching studies of new photochromic ionic liquids studied in real time by in situ irradiation
Source: Royal Society of Chemistry journal article supplement (doi:10.1039/d2nj01194h), 2022-01-01
Supplement: d2nj01194h1.pdf [file d2nj01194h1.pdf]

## Electronic Supplementary Information

### Photoswitching studies of new photochromic ionic liquids studied at real time by *in situ* irradiation

Italo Orellana,<sup>a</sup> Alexis Aspée,<sup>b</sup> Pablo Barrias,<sup>b</sup> Paula A. Santana,<sup>c</sup> Cristian Tirapegui,<sup>\*c</sup>

<sup>a</sup>Departamento de Química, Facultad de Ciencias, Universidad de Chile, Chile.

<sup>b</sup>Departamento de Ciencias Del Ambiente, Facultad de Química y Biología, Universidad de Santiago de Chile, Chile.

<sup>c</sup>Grupo de Química y Bioquímica Aplicada a la Biotecnología, Instituto de Ciencias Químicas Aplicadas, Facultad de ingeniería, Universidad Autónoma de Chile, El Llano Subercaseaux 2801, San Miguel, Santiago, Chile.

\*Corresponding author, E-mail address: [cristian.tirapegui@uautonoma.cl](mailto:cristian.tirapegui@uautonoma.cl)

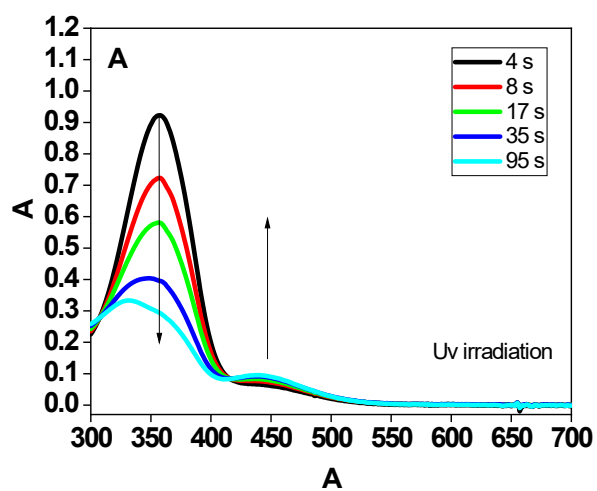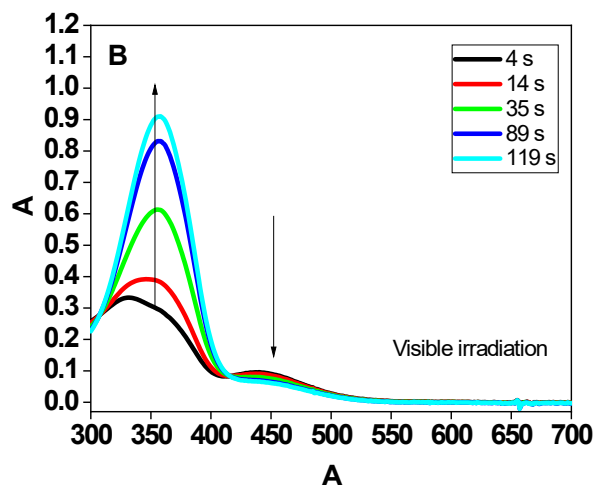

**Figure S1.** Photoisomerization *cis-trans* of  $AZO_{pyr}$  followed by change on absorbance in and MeOH (A and B).  $[AZO_{pyr}]$  in MeOH  $6.94 \times 10^{-5}$  M.

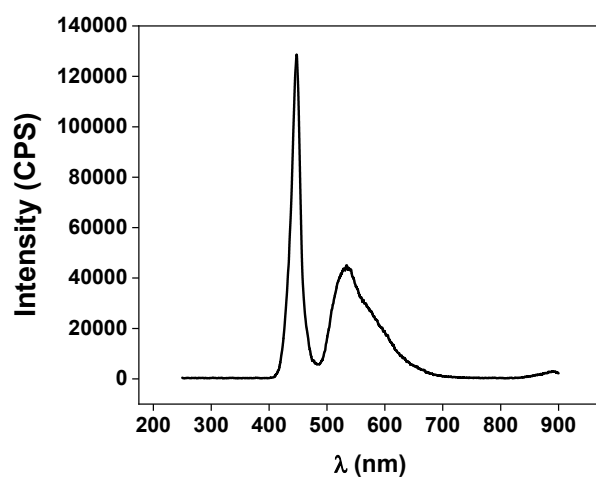

**Figure S2.** Spectra of visible flash dual LED light of ZTE V6 cellphone used as source of light for irradiation experiments.

RT: 0.00 - 10.00 SM: 15G

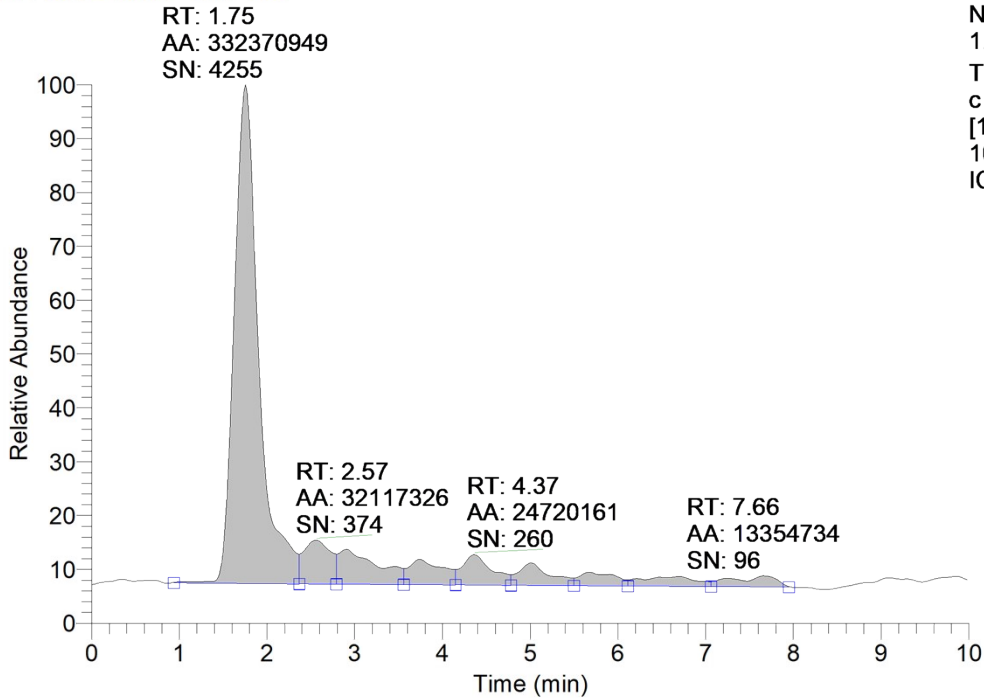

NL:  
1.84E7  
TIC F: ITMS +  
c ESI Full ms  
[100.00-  
1000.00] MS  
ICIS 3b2-01

**A**

3b2-01 #493-521 RT: 1.70-1.77 AV: 5 NL: 1.42E7

F: ITMS + c ESI Full ms [100.00-1000.00]

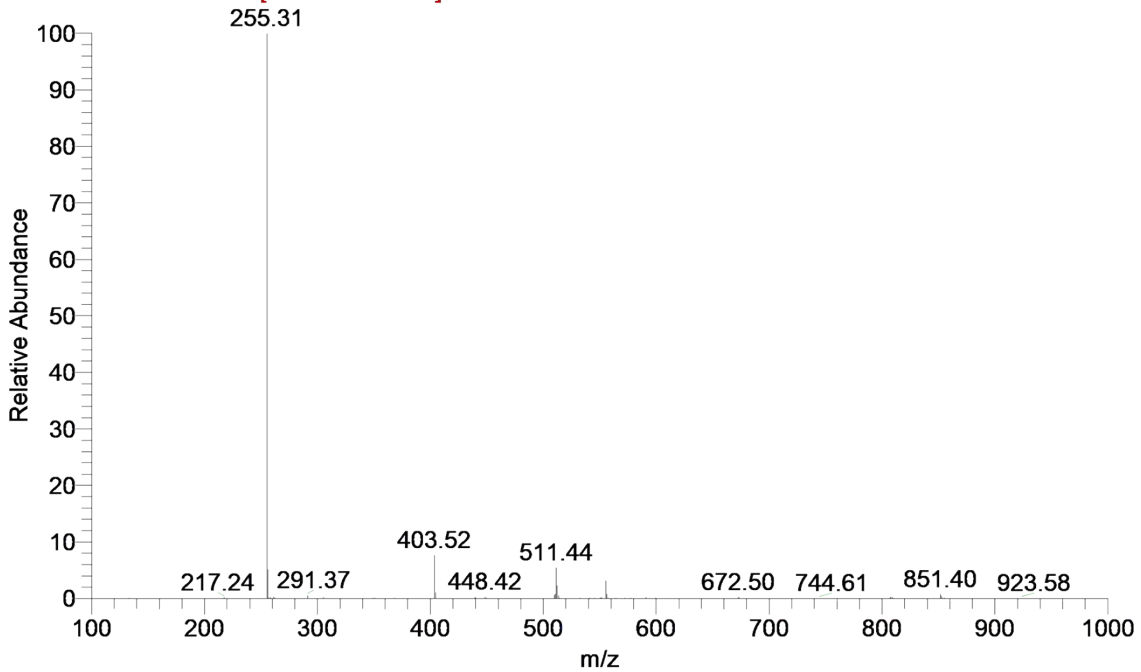

RT: 0.00 - 10.00 SM: 15G

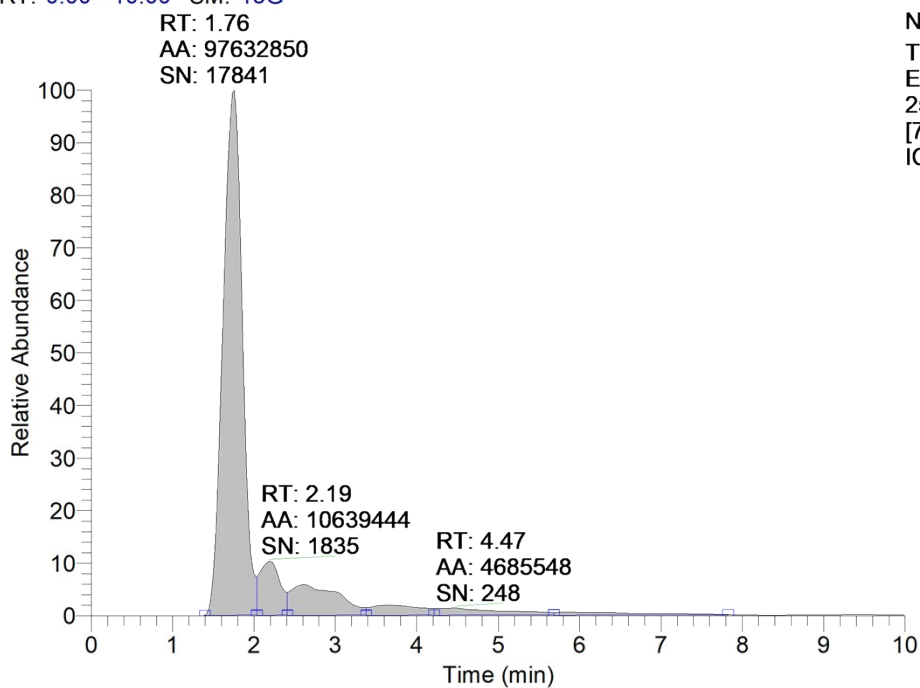

NL: 5.91E6  
TIC F: ITMS + c  
ESI Full ms2  
255.00@cid35.00  
[70.00-800.00] MS  
ICIS 3b2-01

**B**

3b2-01 #469-533 RT: 1.62-1.81 AV: 11 NL: 1.57E6  
F: ITMS + c ESI Full ms2 255.00@cid35.00 [70.00-800.00]

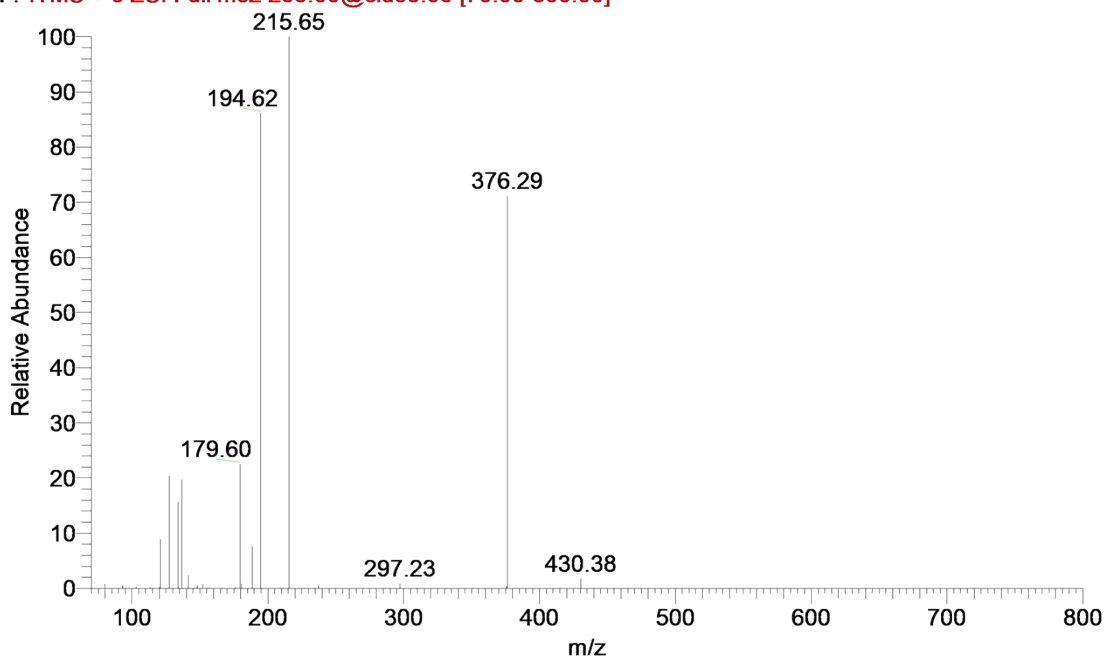

**Figure S3.** UHPLC-TIC (ultra HPLC total ion current) chromatograms and full scan spectra of  $\text{AZO}_{\text{imid}}$  and  $\text{AZO}_{\text{pyr}}$ .

Sample: AZOBr (m/z 510.01482)

Polarity: Positive, Ionization Voltage: 6 kV

D:\Tunes\2021\Julio\Tirapegu\AZOBr

07/15/21 13:57:50

AZOBr #1 RT: 0.01 AV: 1 NL: 8.09E6  
T: FTMS +p ESI Full ms [400.0000-600.0000]

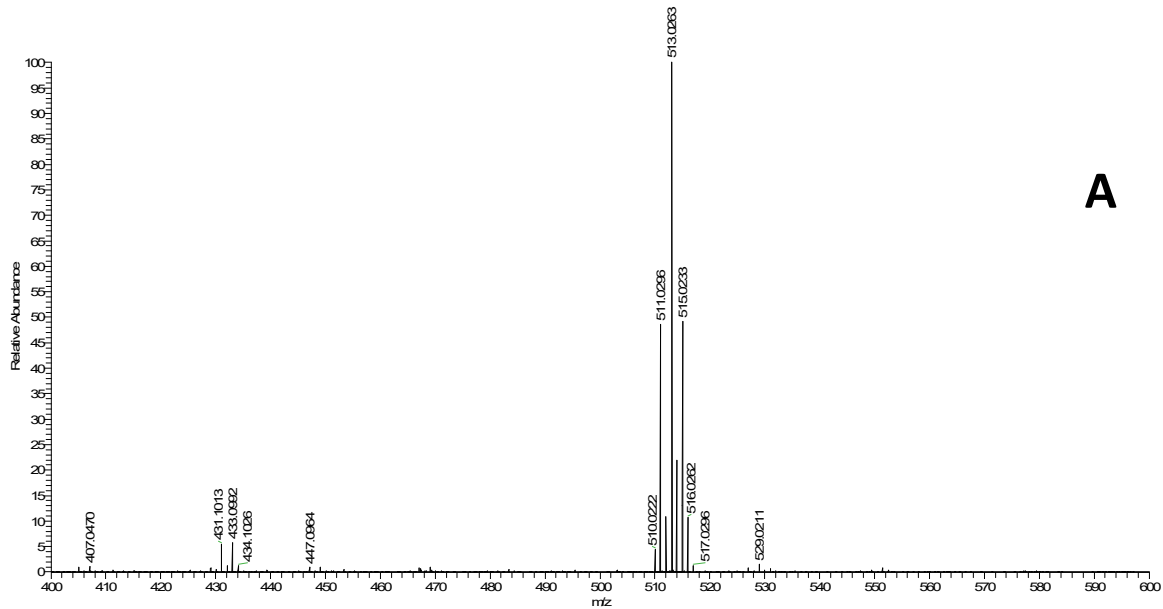

A

Zoom

D:\Tunes\2021\Julio\Tirapegu\AZOBr

07/15/21 13:57:50

AZOBr #1 RT: 0.01 AV: 1 NL: 8.09E6  
T: FTMS +p ESI Full ms [400.0000-600.0000]

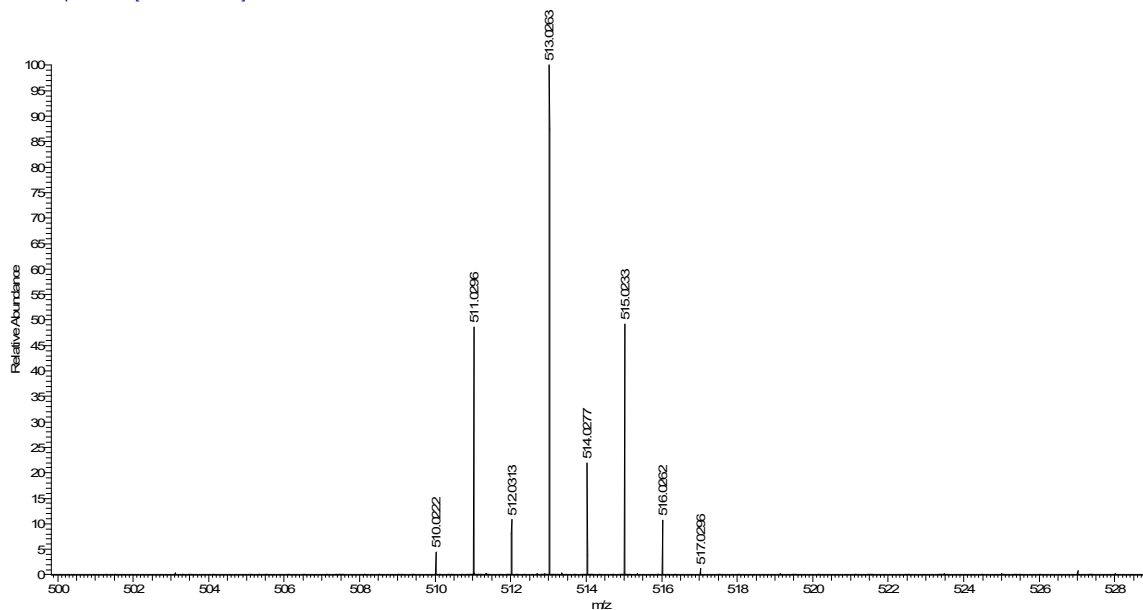

Sample: Azolmid (m/z 674.12102)

Polarity: Positive, Ionization Voltage: 6 kV

D:\Tunes\2021\Julio\Tirapegu\AZolmid

07/15/21 14:09:35

AZolmid #1 RF: 0.01 AV: 1 NL: 5.21E7  
T: FTMS +p ESI Full ms [500.0000-800.0000]

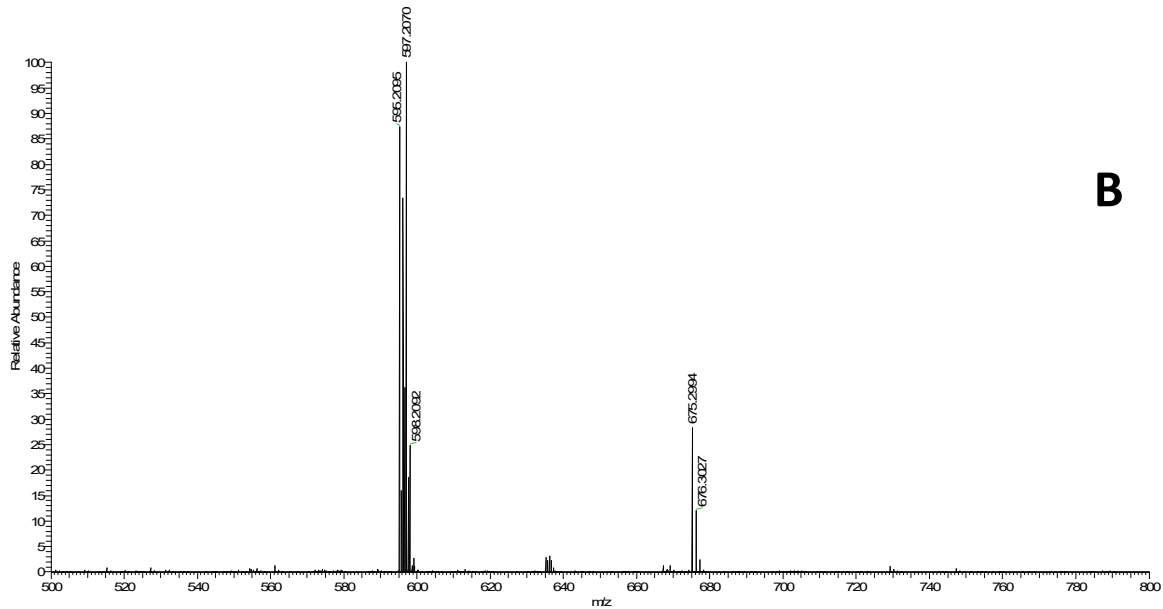

Zoom1

D:\Tunes\2021\Julio\Tirapegu\AZolmid

07/15/21 14:09:35

AZolmid #1 RF: 0.01 AV: 1 NL: 5.21E7  
T: FTMS +p ESI Full ms [500.0000-800.0000]

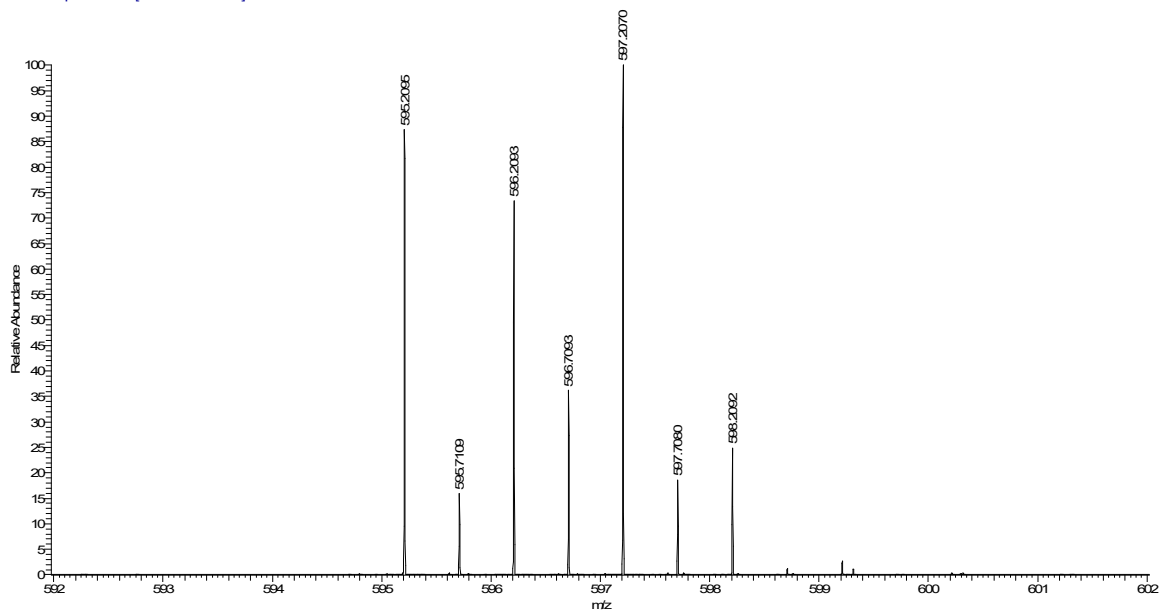

# Zoom2

D:\Tues\2021\Ulid\Tirapegu\A2\Chid

07/15/21 14:09:35

A2Chid #1 RF: 0.01 AV: 1 NL: 1.47E7  
T: FTMS +p ESI Full ms [500.0000-800.0000]

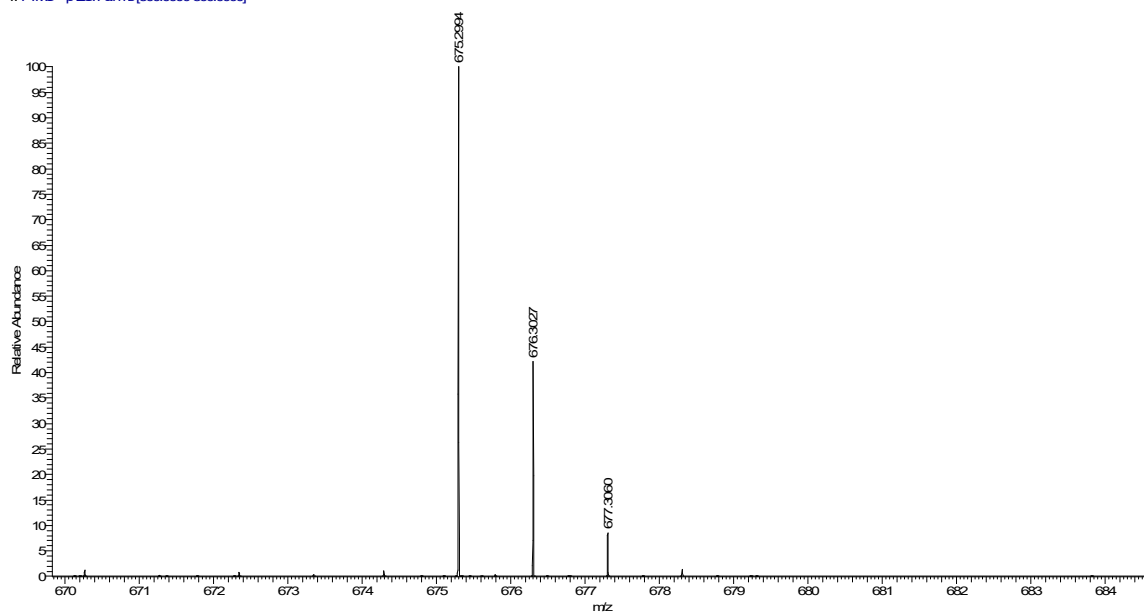



Sample: Azopyr (m/z 668.09922)

Polarity: Positive, Ionization Voltage: 6 kV

D:\Tunes\2021\UJid\Tirapegu\AZCpyr6

07/19/21 13:40:59

AZCpyr6 #1 RT: 0.01 AV: 1 NL: 5.0E5  
T: FTMS +p ESI Full ms [400.0000-700.0000]

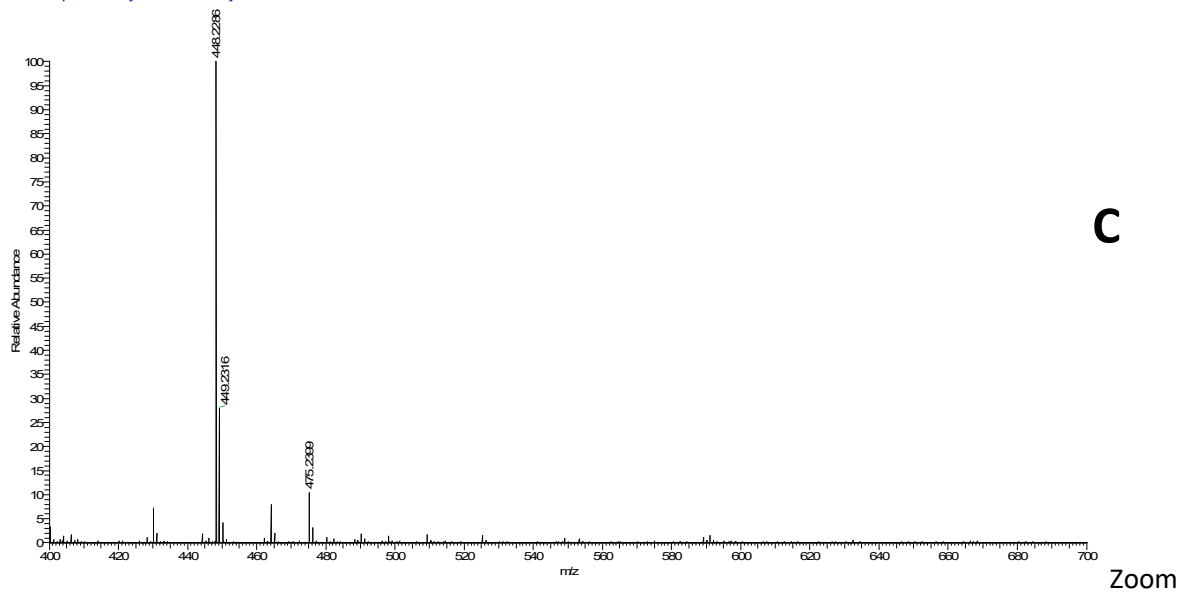

1

D:\Tunes\2021\UJid\Tirapegu\AZCpyr7

07/19/21 13:40:21

AZCpyr7 #1 RT: 0.02 AV: 1 NL: 1.00E4  
T: FTMS +p ESI Full ms [500.0000-700.0000]

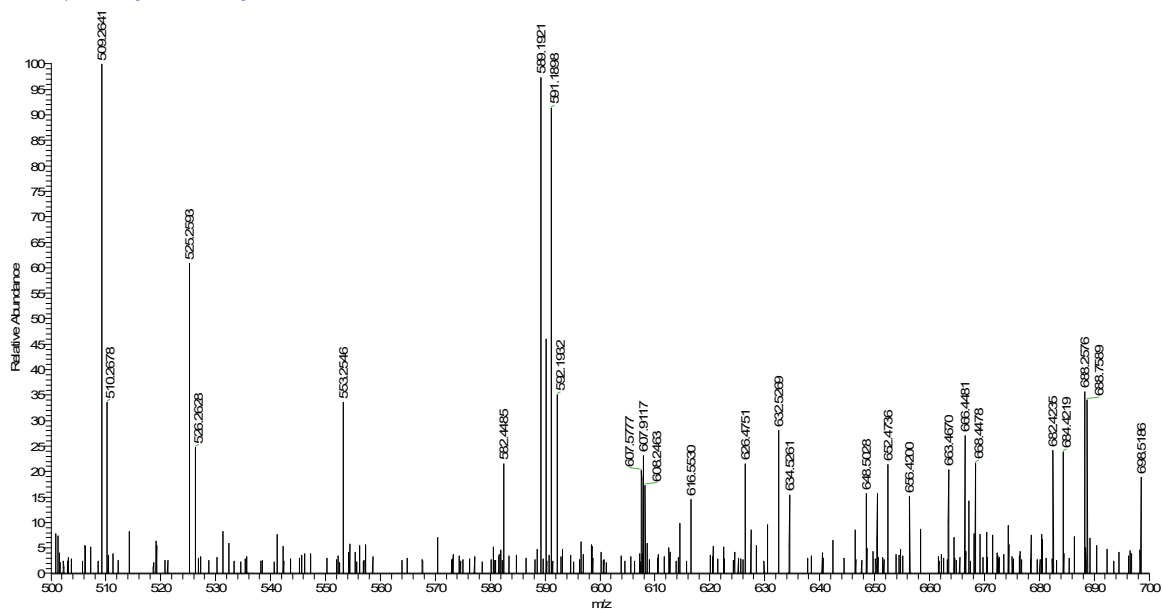

Figure S4. High Resolution Mass Spectrometry of AZO<sub>Br</sub> (A), AZO<sub>imid</sub> (B) and AZO<sub>pyr</sub> (C).

9

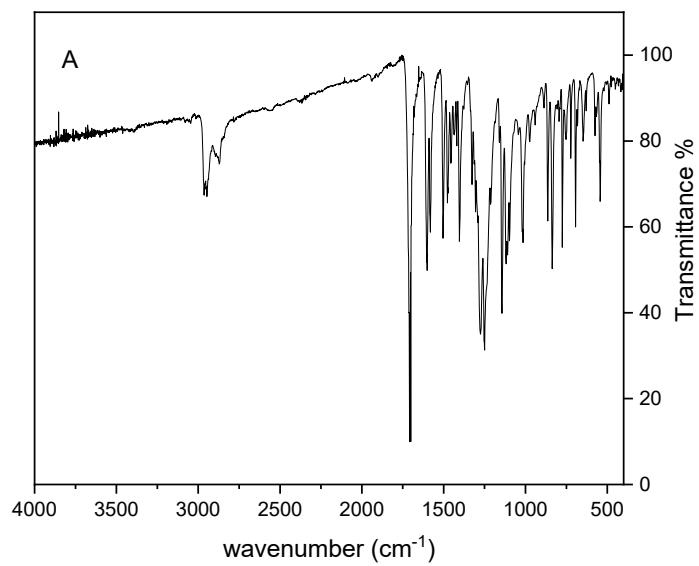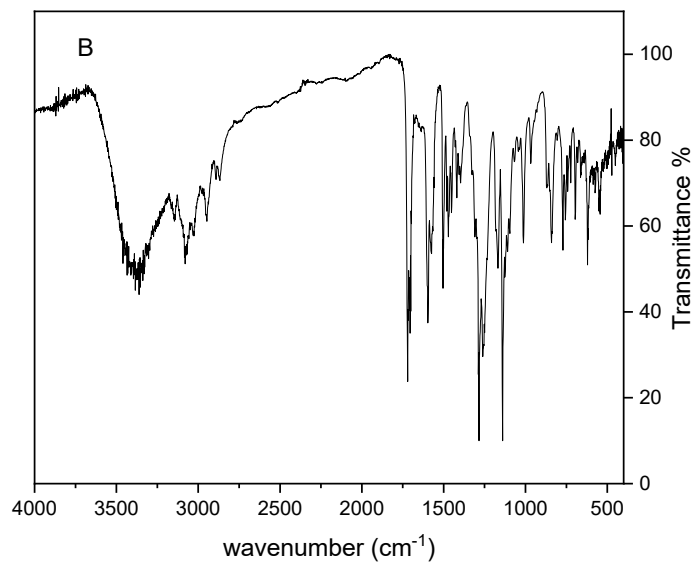

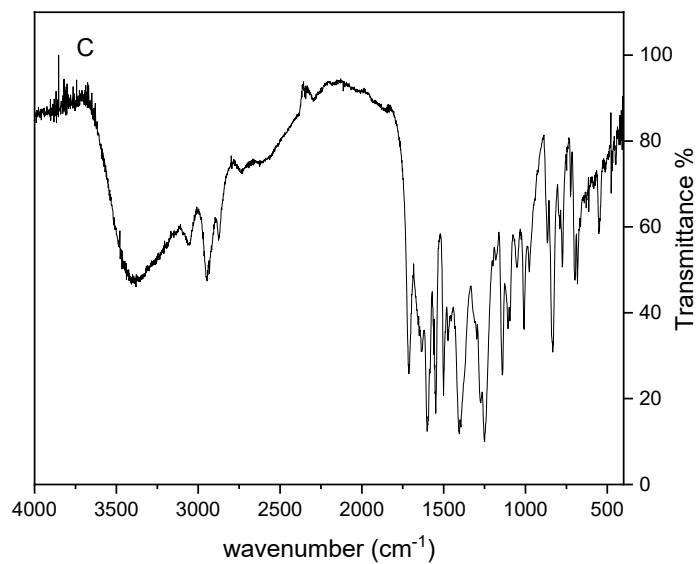

**Figure S5.** Infrared spectra of AZO<sub>Br</sub> (A), AZO<sub>imid</sub> (B) and AZO<sub>pyr</sub> (C).

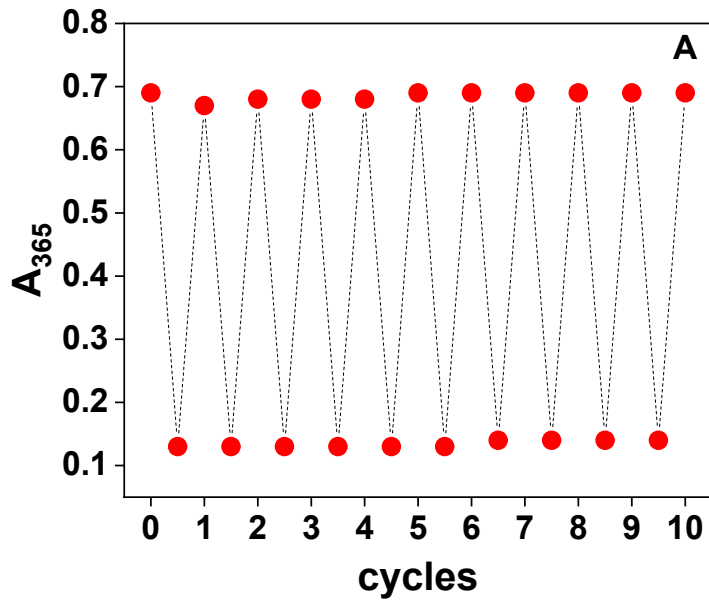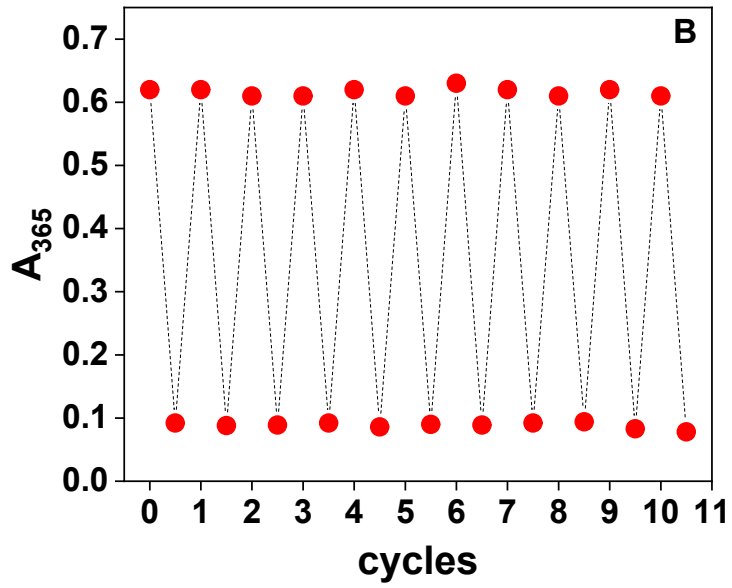

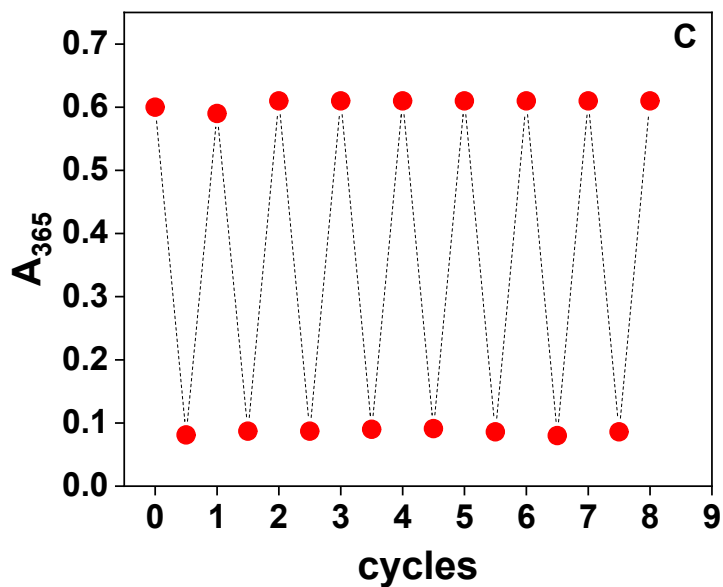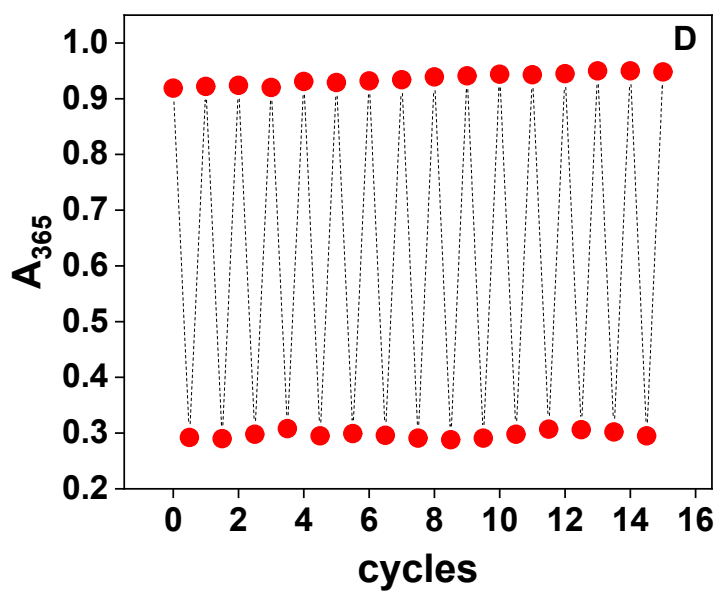

**Figure S6.** Material fatigue for  $AZO_{Br}$  in MeOH (A), DMSO (B), PAF (C) and  $AZO_{Br}$  in MeOH (D).  $[AZO_{Br}]_{MeOH} = 3.03 \times 10^{-5}$  M,  $[AZO_{Br}]_{DMSO, PAF} = 3.50 \times 10^{-5}$  and  $[AZO_{pyr}]_{MeOH} = 6.94 \times 10^{-5}$  M.
